# Supplementary material for: Base-etch removal of a ligand shell in thin films of ZnO nanoparticles for electronic applications
Source: Royal Society of Chemistry journal article supplement (doi:10.1039/c3tc31059k), 2013-01-01
Supplement: c3tc31059k.pdf [file c3tc31059k.pdf]

## Supporting Information to

### Base-etch removal of a ligand shell in thin films of ZnO nanoparticles for electronic applications

Dennis Weber,<sup>\*a,b</sup> Richa Sharma,<sup>b,c</sup> Silviu Botnaraş,<sup>b</sup> Duy Vu Pham,<sup>b</sup> Jürgen Steiger<sup>b</sup>  
and Luisa De Cola<sup>d</sup>

<sup>a</sup> *Physikalisches Institut and Center for Nanotechnology (CeNTech), Westfälische Wilhelms-Universität Münster, Heisenbergstrasse 11, 48149 Münster, Germany;*

<sup>b</sup> *Evonik Industries AG, Coatings & Additives, Paul-Baumann-Strasse 1, 45764 Marl, Germany*

<sup>c</sup> *School of Engineering and Science, Jacobs University Bremen, Campus Ring 1, 28759 Bremen*

<sup>d</sup> *Institut de Science et d'Ingénierie Supramoléculaires (ISIS), Université de Strasbourg, 8 allée Gaspard Monge, 6700 Strasbourg, France*

E-mail: d\_webe06@uni-muenster.de

**Table S1:** Thickness values of spectroscopic ellipsometry measurements show the resistance of the ZnO layer annealed at 550 °C towards the base-etch solutions with different concentrations of KOH in isopropanol.

| Base etch   | $d_{\text{ZnO}}$<br>[nm] | $n_{\text{ZnO}}$ | $d_{\text{SiO}_2}$<br>[nm] | $n_{\text{SiO}_2}$ |
|-------------|--------------------------|------------------|----------------------------|--------------------|
| as annealed | 16.03                    | 1.558            | 231.67                     | 1.450              |
| 0.001M      | 14.86                    | 1.558            | 231.45                     | 1.448              |
| 0.01M       | 14.71                    | 1.558            | 231.11                     | 1.450              |
| 0.1M        | 15.08                    | 1.558            | 231.95                     | 1.450              |
| 1M          | 15.17                    | 1.558            | 232.08                     | 1.449              |

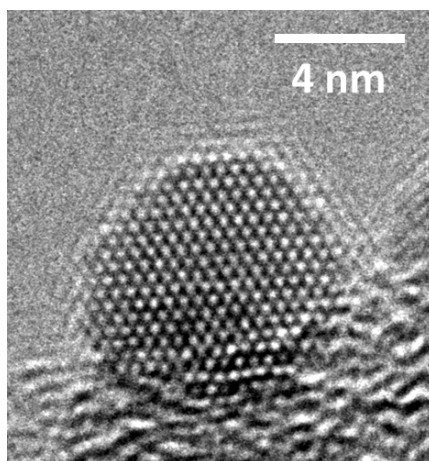

**Fig. S1:** High Resolution Transmission Electron Microscope image of the zinc oxide nanoparticles.

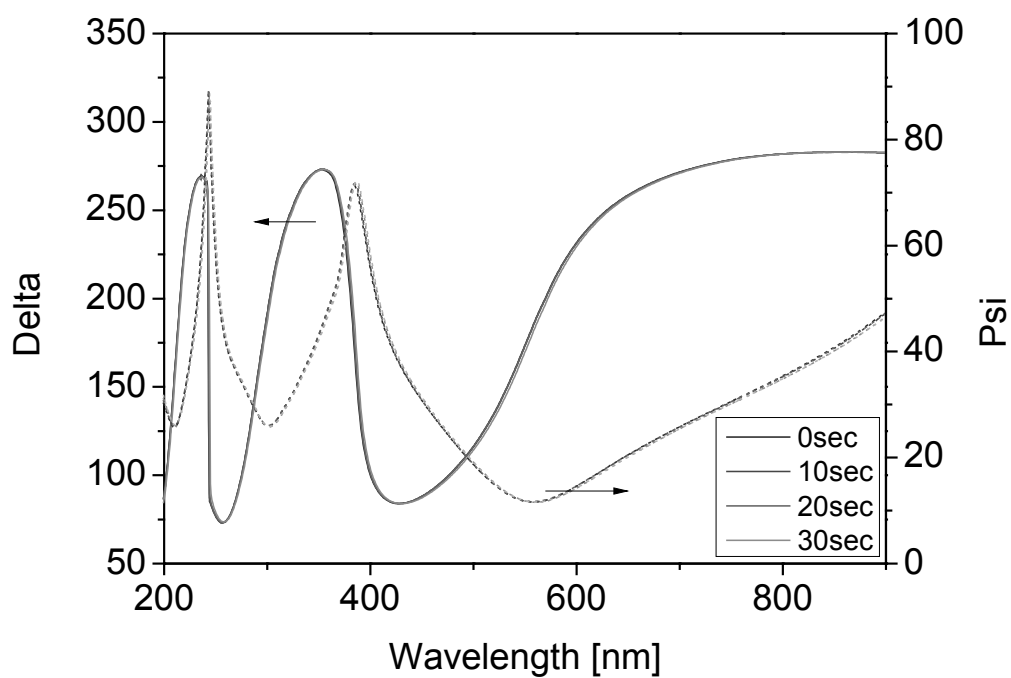

**Fig. S2:** Psi and Delta of spectroscopic ellipsometry measurements of films treated with the 0.01M base-etch for different durations. The little deviation shows that the films dried at 150 °C are not attacked by the base.

**Table S2:** Fitted data corresponding to Fig. S1.

| Time [sec] | $d_{\text{ZnO}}$ [nm] | $n_{\text{ZnO}}$ | $d_{\text{SiO}_2}$ [nm] | $n_{\text{SiO}_2}$ |
|------------|-----------------------|------------------|-------------------------|--------------------|
| 0          | 20.04                 | 1.528            | 230.05                  | 1.446              |
| 10         | 18.79                 | 1.528            | 230.16                  | 1.453              |
| 20         | 18.49                 | 1.528            | 230.51                  | 1.453              |
| 30         | 18.93                 | 1.528            | 230.97                  | 1.454              |

**Table S3:** Atomic concentration of the different species according to XPS analysis. [a] = zinc is used as the reference and set to 100 %.

|                              | <b>No<br/>treatment</b> | <b>0M<br/>solvent</b> | <b>0.01M<br/>solution</b> |
|------------------------------|-------------------------|-----------------------|---------------------------|
| <b>Zn<sup>[a]</sup> - 3s</b> | 100 %                   | 100 %                 | 100 %                     |
| <b>O - 1s</b>                | 109.1 %                 | 114 %                 | 117.5 %                   |
| <b>C - 1s</b>                | 75.8 %                  | 78.4 %                | 63.9 %                    |

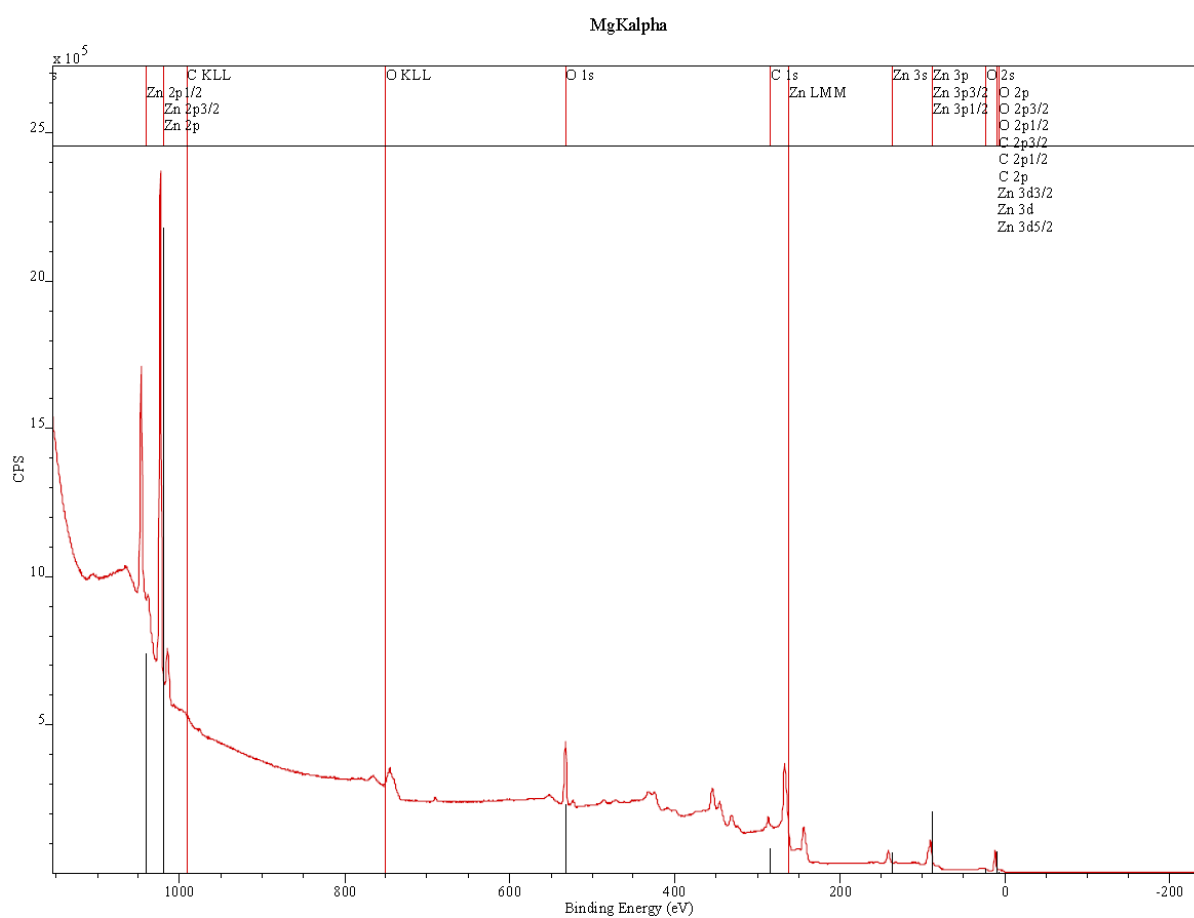

**Fig. S3:** Coarse XPS scan of a representative sample including the position of the peaks.

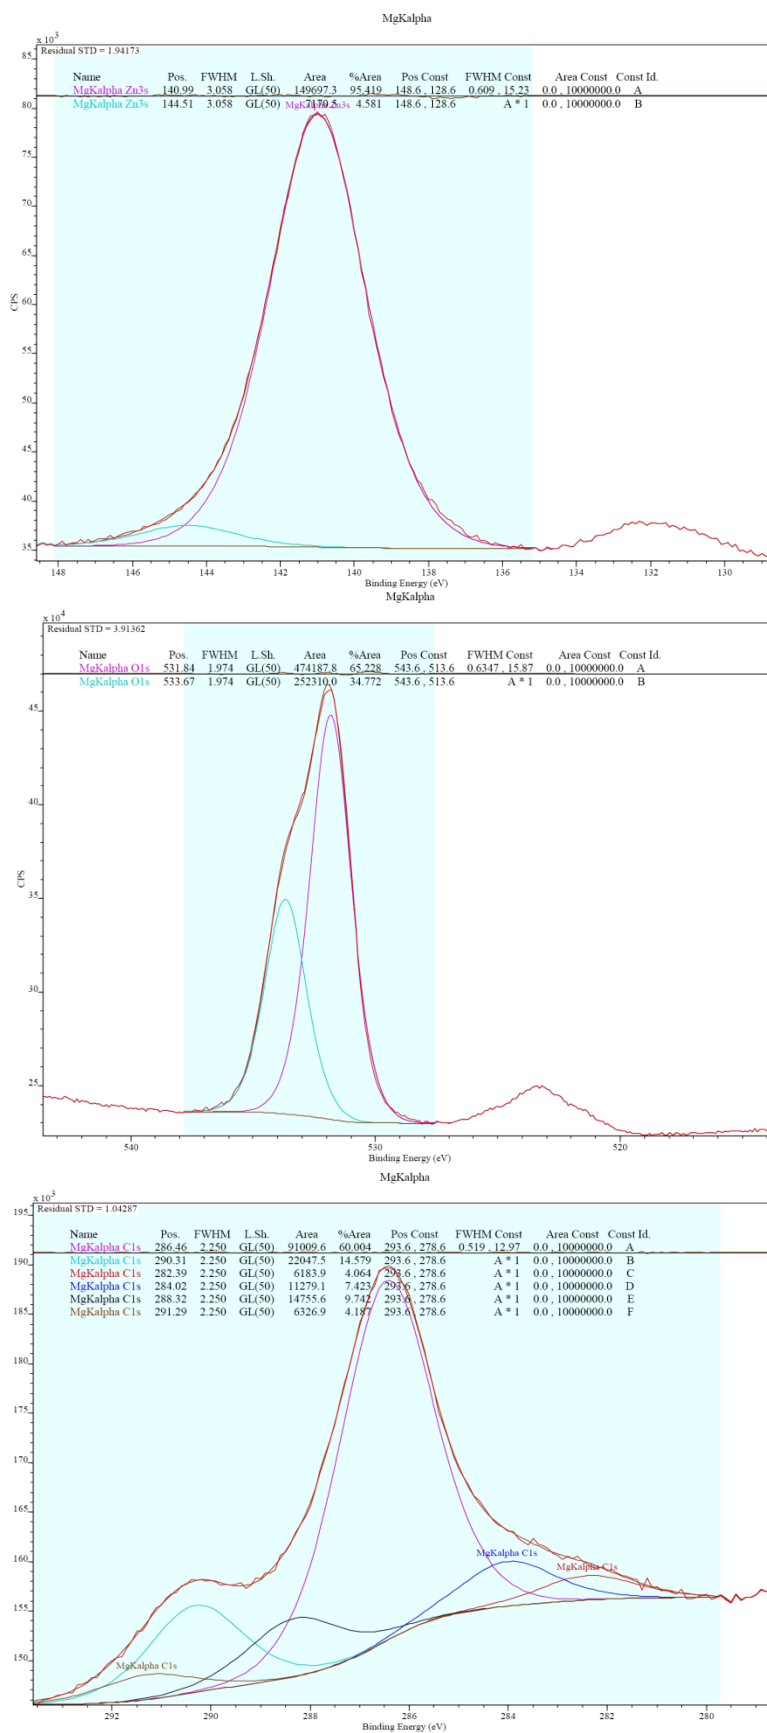

**Fig. S4:** Zn 3s (top), O 1s (center) and C 1s (bottom) XPS spectra of the sample treated with isopropanol (OM), the other samples were analyzed accordingly. The area used for fitting the data is marked in light blue.

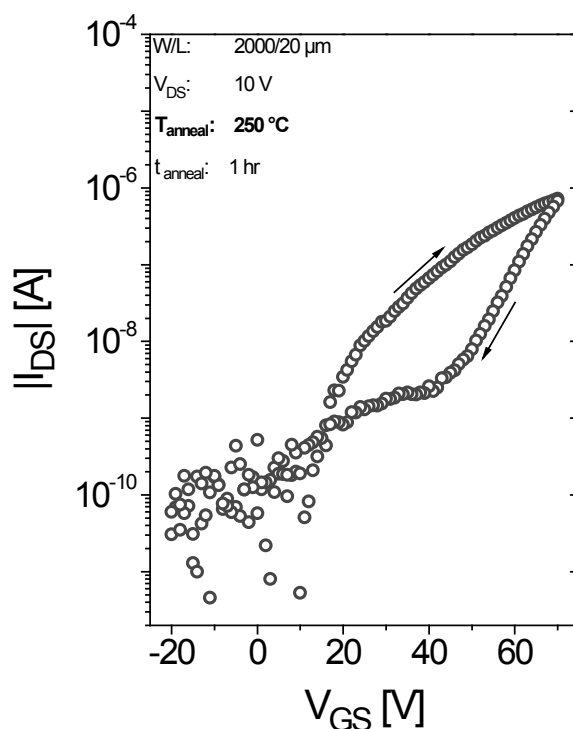

**Fig. S5:** Transfer characteristic of a sample treated with the 1M base etch and annealed at 250 °C. The film morphology corresponds to Fig. 4 (1M KOH solution).

**Table S4:** Device parameters of untreated, solvent treated (0M) and base-etch treated samples annealed at different temperatures. The respective transfer characteristics are displayed in Fig. 5.  $W/L = 2000 \mu\text{m}/20 \mu\text{m}$ ;  $V_{GS}$  from -20 to 70 V;  $V_{DS}$ :  $\mu_{lin}$  at 4 V.  $\mu_{sat}$  at 10 V;  $d_{SiO_2} = 230 \text{ nm}$ .

| Treatment<br>[mol l <sup>-1</sup> ] - [°C] | $V_{On}$<br>[V] | $I_{On}$<br>[μA]     | $I_{On}/I_{Off}$  | $\mu_{lin}$<br>[cm <sup>2</sup> V <sup>-1</sup> s <sup>-1</sup> ] | $\mu_{sat}$<br>[cm <sup>2</sup> V <sup>-1</sup> s <sup>-1</sup> ] |
|--------------------------------------------|-----------------|----------------------|-------------------|-------------------------------------------------------------------|-------------------------------------------------------------------|
| None - 150                                 | 33              | $3.2 \times 10^{-2}$ | $1.6 \times 10^2$ | -                                                                 | $3.2 \times 10^{-5}$                                              |
| 0 - 150                                    | 29              | 0.1                  | $5.0 \times 10^2$ | $2.0 \times 10^{-4}$                                              | $1.0 \times 10^{-4}$                                              |
| 0.01 - 150                                 | 20              | 0.6                  | $6.0 \times 10^3$ | $1.1 \times 10^{-3}$                                              | $5.4 \times 10^{-4}$                                              |
| None - 250                                 | 20              | 0.25                 | $1.3 \times 10^3$ | $5.5 \times 10^{-4}$                                              | $2.9 \times 10^{-4}$                                              |
| 0 - 250                                    | 16              | 1.0                  | $1.7 \times 10^3$ | $2.0 \times 10^{-3}$                                              | $9.7 \times 10^{-4}$                                              |
| 0.01 - 250                                 | 13              | 6.0                  | $1.2 \times 10^4$ | 0.015                                                             | $4.0 \times 10^{-3}$                                              |
| None - 350                                 | 10.5            | 3.4                  | $6.8 \times 10^4$ | $8.0 \times 10^{-3}$                                              | $2.2 \times 10^{-3}$                                              |
| 0 - 350                                    | 9.5             | 9.4                  | $1.3 \times 10^5$ | 0.026                                                             | $7.3 \times 10^{-3}$                                              |
| 0.01 - 350                                 | 5               | 47                   | $9.4 \times 10^5$ | 0.14                                                              | 0.02                                                              |

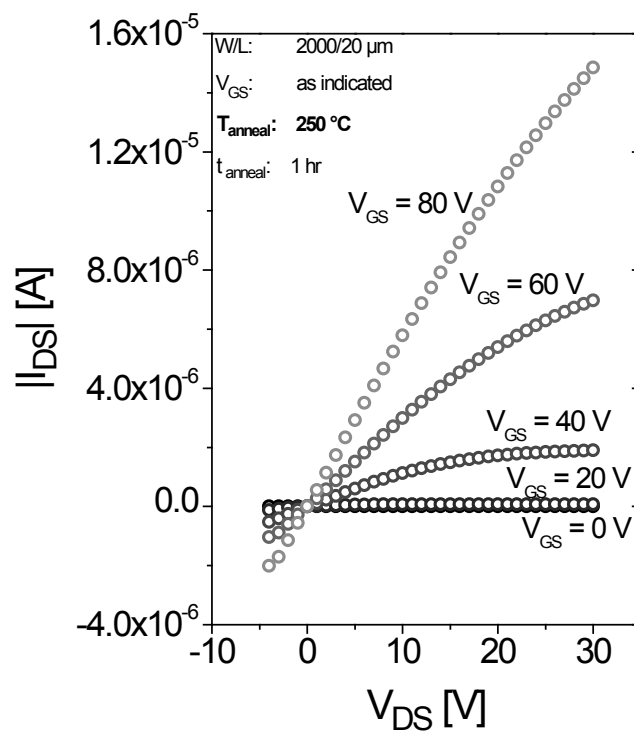

**Fig. S6:** Output characteristic of a device treated with the 0.01M base-etch and annealed at 250  $^{\circ}\text{C}$ .
